# Supplementary material for: A New Model Algorithm for Estimating the Inhalation Exposure Resulting from the Spraying of (Semi)-Volatile Binary Liquid Mixtures (SprayEva)
Source: MDPI journal article supplement (doi:10.3390/ijerph192013182), 2022-10-13
Supplement: s1 [file s1]

## Supplementary materials

### Pseudocode for the room spraying scenario using the extended Euler method

This piece of pseudo code, which is based on Mathematica<sup>®</sup>, is only for the clarification of the basic ideas and is restricted to a binary mixture ( $N_c = 2$ ). The algorithm starts with the definition of input parameters and corresponding functions and relations. The functions  $f_1, f_2, f_3, f_4, f_5, f_6, f_7, f_8, f_9, f_{10}, f_{11}, f_{12}, f_{13}$  are defined according to equations 1, 22, 23, 19, 20, 15, 15, 27, 27, 25, 25, 3, 3 for both components. The functions for the activity coefficients  $\gamma_1; \gamma_2$  must be specified depending on the corresponding substances. The initial values for the airborne concentrations are  $A_i(0), C_i(0)$  (that is,  $t_k = 0$ ) and the other model input parameters must be defined as well.

Discretizing the involved variables is achieved using Mathematica<sup>®</sup> lists. Please note that the indices  $k, l, ds$  are depicted in square brackets. The iteration algorithm is implemented by three nested Do loops. The  $k$ -loop represents the time discretization, the  $l$ -loop the spatial discretization, and the  $ds$ -loop runs through the droplet size classes. The symbol  $Aev1$  represents the sum of vapour emission from the aerosol and  $A1$  the sum of aerosol concentration over all release pulses and droplet size classes of component 1 (2 analogue). The symbol  $msed1$  represents the sum of the sedimentation flows of component 1 over all release pulses and droplet size classes. The symbol  $mF1$  stands for the amount of component 1 on the floor. Finally, the airborne concentrations  $AI(t)$  and  $C_i(t)$  as discrete functions of time  $t$  are obtained by transposing the  $t_k$  and  $C_i(t_k), AI(t_k)$  lists.

$Nt;;IM;;T;;\beta_i;;t_{app};;t_{expo};;M_i;;V;;Q;;$   
 $R;;C_i(0);;A(0);;\theta;;v_0;;D_0;;p_i^*;;rr;;d_m;;GSD$

(\*Defining parameters\*)

$\Delta t;;\gamma_i;;f_{1-13};;$

(\*Defining functions and relations\*)

$A[l, ds] = \text{Table}[A(0), \{l, 1, Nt\}, \{ds, NC\}];$   
 $d[k] = \text{Table}[d(0), \{l, 1, Nt\}, \{ds, NC\}];$   
 $x_i[k] = \text{Table}[x(0), \{l, 1, Nt\}, \{ds, NC\}];$   
 $Aev1[l, ds] = \text{Table}[0, \{l, 1, Nt\}];$   
 $A1[k] = \text{Table}[0, \{k, 1, Nt\}];$   
 $A1[t] = \text{Table}[0, \{t, 0, Nt, \Delta t\}];$   
 $msed1k[l, ds] = \text{Table}[0, \{l, 1, Nt\}];$   
 $mF1[l, ds] = \text{Table}[0, \{l, 1, Nt\}];$   
 $C_i[k] = \text{Table}[C_i(0), \{k, 1, Nt\}];$   
 $C_i[t] = \text{Table}[C_i(0), \{k, 1, Nt, \Delta t\}];$   
 $t[k] = \text{Table}[k \cdot \Delta t, \{k, 1, Nt\}];$

(\*Establishing lists of discretized variables, taking into account initial conditions\*)

$\text{Do}[A[l, ds] = A[l, ds] + \Delta t \cdot f1[A[l, ds], d[l, ds], x_1[l, ds], C_1[k], C_2[k]];]$   
 $d[l, ds] = d[l, ds] + \Delta t \cdot f2[d[l, ds], x_1[l, ds], C_1[k], C_2[k]];]$   
 $x_1[l, ds] = x_1[l, ds] + \Delta t \cdot f3[d[l, ds], x_1[l, ds], C_1[k], C_2[k]];]$   
 $Aev1[k] = Aev1[k] + f4[A[l, ds], d[l, ds], x_1[l, ds], C_2[k]];]$   
 $Aev2[k] = Aev2[k] + f5[A[l, ds], d[l, ds], x_1[l, ds], C_2[k]];]$   
 $A1[k] = A1[k] + A[l, ds] \frac{M_1 \cdot x_1[l, ds]}{M_2 + M_1 \cdot x_1[l, ds] - M_2 \cdot x_1[l, ds]}$

(\*Iteration by three nested Do loops\*)

$$\begin{aligned}
A2[[k]] &= A2[[k]] + A[[l, ds]] \frac{M_2 - M_2 \cdot x_1[[l, ds]]}{M_2 + M_1 \cdot x_1[[l, ds]] - M_2 \cdot x_1[[l, ds]]} \\
msed1[[k]] &= msed1[[k]] + f6 \left[ A[[l, ds]], d[[l, ds]], x_1[[l, ds]] \right]; \\
msed2[[k]] &= msed2[[k]] + f7 \left[ A[[l, ds]], d[[l, ds]], x_1[[l, ds]] \right]; \\
mF1[[k + 1]] &= mF1[[k]] + \Delta t \cdot f8 \left[ msed1[[k]], mF1[[k]], mF2[[k]], C_1[[k]] \right]; \\
mF2[[k + 1]] &= mF2[[k]] + \Delta t \cdot f9 \left[ msed2[[k]], mF2[[k]], mF2[[k]], C_2[[k]] \right]; \\
\text{If} \left[ mF1[[k]] > 0, mevf1[[k]] = f10 \left[ mF1[[k]], mF2[[k]], C_1[[k]] \right], mevf1[[k]] = msed1[[k]] \right]; \\
\text{If} \left[ mF2[[k]] > 0, mevf2[[k]] = f11 \left[ mF1[[k]], mF2[[k]], C_2[[k]] \right], mevf2[[k]] = msed2[[k]] \right]; \\
C_1[[k + 1]] &= C_1[[k]] + \Delta t \cdot f12 \left[ C_1[[k]], Aev1[[k]], mevf1[[k]] \right]; \\
C_2[[k + 1]] &= C_2[[k]] + \Delta t \cdot f13 \left[ C_2[[k]], Aev2[[k]], mevf2[[k]] \right]; \\
\{k, 1, Nt\}, \{l, 1, k\}, \{ds, 1, N_c\}; \\
C_1[[t]] &= \text{Transpose} \left[ t[[k]], C_1[[k]] \right]; \\
C_2[[t]] &= \text{Transpose} \left[ t[[k]], C_2[[k]] \right]; \\
A1[[t]] &= \text{Transpose} \left[ t[[k]], A1[[k]] \right]; \\
A2[[t]] &= \text{Transpose} \left[ t[[k]], A2[[k]] \right];
\end{aligned}$$

(\*Obtaining  $C_l$ ,  $C_2$ ,  $A_l$ ,  $A_2$  as a function of time\*)
